# Supplementary material
Source: PubMed Central journal article supplement (PMC2675750)
Supplement: pp.109.137745_3.pdf [file pp.109.137745_3.pdf]

## SUPPLEMENTAL DATA

### Supplementary tables

Table S1. Phosphinothricin resistance of F<sub>2</sub> progenies of the *ltpg1* heterozygotes (F<sub>1</sub>), which were generated by crossing the *ltpg1* mutant with the wild-type.

| Cross <sup>a</sup> | Independent lines | Phosphinothricin resistance   |                               |       |
|--------------------|-------------------|-------------------------------|-------------------------------|-------|
|                    |                   | <sup>b</sup> PPT <sup>R</sup> | <sup>c</sup> PPT <sup>S</sup> | Ratio |
| WT X <i>ltpg1</i>  | 1                 | 82                            | 28                            | 2.9   |
|                    | 4                 | 163                           | 54                            | 3.0   |
|                    | 7                 | 63                            | 21                            | 3.0   |

<sup>a</sup> The parental genotype (ecotype Columbia background)  
<sup>b</sup> PPT<sup>R</sup>: Number of phosphinothricin-resistant seedlings  
<sup>c</sup> PPT<sup>S</sup>: Number of phosphinothricin-sensitive seedlings

Table S2. Oligonucleotide sequences used in this study.

| Reactions                                     | Primer name                              | Sequence information                                              | Annealing T <sub>m</sub> for PCR (°C) | Enzyme site  |
|-----------------------------------------------|------------------------------------------|-------------------------------------------------------------------|---------------------------------------|--------------|
| Mutant isolation, RT-PCR and Real-time RT-PCR | LB1                                      | 5'-GCC TTT TCA GAA ATG GAT AAA TAG CCT TGC TTC C-3'               | 60                                    |              |
|                                               | AtLTPG-1 cDNA F2                         | 5'-GCC CGG GAT AAT GAA GGG TCT TCA T-3'                           | 58                                    | <i>SmaI</i>  |
|                                               | AtLTPG-1 cDNA R2                         | 5'-CGG ATC CTT ACA TCC CTA ATG TGA C-3'                           | 58                                    | <i>BamHI</i> |
|                                               | actin2 F1                                | 5'-CAT CCA AGC TGT TCT CTC CTT GTA C-3'                           | 58                                    |              |
|                                               | actin2 R1                                | 5'-CAG ACA CTG TAC TTC CTT TCA GGT G-3'                           | 58                                    |              |
|                                               | actin2 F1 (real-time)                    | 5'-GGT AAC ATT GTG CTC AGT GGT GG-3'                              | 58                                    |              |
|                                               | actin2 R1(real-time)                     | 5'-AAC GAC CTT AAT CTT CAT GCT GC-3'                              | 58                                    |              |
|                                               | actin7 F1                                | 5'-CGC GGT TCT TGA GAA GAC CGG TGT GA -3'                         | 58                                    |              |
|                                               | actin7 R2                                | 5'-GAG CTT CTC CAG CTA TCG CCA TTA GG-3'                          | 58                                    |              |
|                                               | AtLTPG-1 cDNA F1                         | 5'-CGG ATC CTG ATA ATG AAG GGT CTT CA-3'                          | 58                                    | <i>BamHI</i> |
| AtLTPG-1 cDNA R1                              | 5'-CGG ATC CAC ATC CCT AAT GTG ACA TG-3' | 58                                                                | <i>BamHI</i>                          |              |
| Promoter analysis, and Complementation        | AtLTPG-1 GUS F1                          | 5'-CTC TAG AAG GAT ACG TAG ACA ATT GGT AG-3'                      | 58                                    | <i>XbaI</i>  |
|                                               | AtLTPG-1 GUS R1                          | 5'-GCC CGG GGC TTG TTG AAG ATC TTG TTT G-3'                       | 58                                    | <i>SmaI</i>  |
|                                               | AtLTPG-1 R3                              | 5'-ACC CGG GGG ACT TGG GAT TGG CTG AGG TT-3'                      | 58-60                                 | <i>SmaI</i>  |
|                                               | NPTII F                                  | 5'-GGG GCA GGA TCT CCT GTC ATC TC-3'                              | 58                                    |              |
|                                               | NPTII R                                  | 5'-GCG CTG CGA ATC GGG AGC GGC G-3'                               | 58                                    |              |
| Subcellular localization                      | YFP-F1                                   | 5'-GGC CGG CCT GGA GGT GGA GGT GGA GCT GTG AGC AAG GGC-3'         | 52                                    | <i>FseI</i>  |
|                                               | YFP-R1                                   | 5'-GGC CCC AGC GGC CGC AGC AGC ACC AGC AGG GTC CTT GTA CAG CTC-3' | 52                                    | <i>SfiI</i>  |
|                                               | AtLTPG-1 P1                              | 5'-TCC ACC TCC ACC TCC AGG CCG GCC TGA AGC TGA TCC TCC CTT-3'     | 64-58                                 |              |
|                                               | AtLTPG-1 P2                              | 5'-GGT GCT GCT GCG GCC GCT GGG GCC GCA AAG GAT GGT CAC GCA-3'     | 64-58                                 |              |

Supplementary figures

Figure S1. Expression of the *LTPG1* transcripts in various tissues (A) and 10-day-old seedlings after exogenous applications of abiotic stresses and the stress hormone, ABA (B). R, roots; S, 10-day-old seedlings; L, rosette leaves; C, cauline leaves; F, flowers; Si, siliques. (B) Ten-day-old Arabidopsis seedlings were incubated in liquid MS medium supplemented with H<sub>2</sub>O (control), 200 mM NaCl, 200 mM mannitol, 20% PEG or 1 μM ABA for 6 h. Total RNA (0.1 μg) was used for the RT-PCR analysis. The *actin7* (At5g09810) gene was used to determine the quantity and quality of the cDNAs. The *rd29A* gene (At5g52310) was used as a drought stress-inducible marker.

Figure S2. Complementation of the *ltpg-1* mutants by introduction of the *LTPG1* genomic clone. (A) Schematic diagram of binary vectors containing the *LTPG1* genomic DNA. The resultant binary vector was transformed into the *ltpg1* mutants. (B) Chromosomal DNA was isolated from wild-type, *ltpg1* mutants and transgenic *ltpg1* lines and then subjected to PCR. (C) RT-PCR analysis of *LTPG1* transcripts from wild-type, *ltpg1* mutants and transgenic *ltpg1* lines.
