# Supplementary material
Source: PubMed Central journal article supplement (PMC2675750)

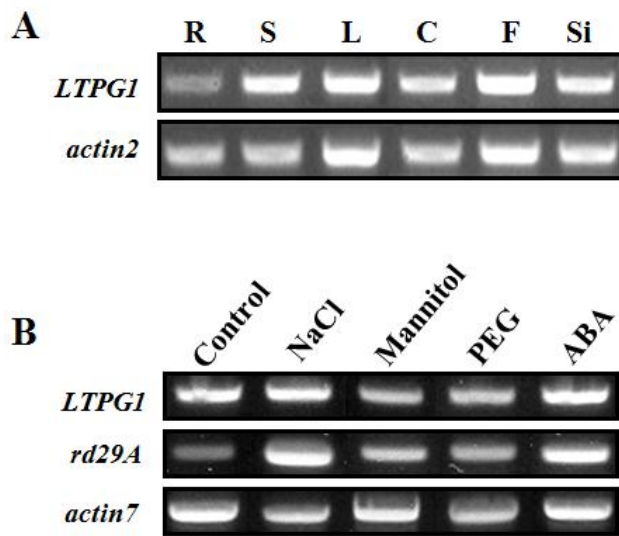

Supplementary Figure 1.

Supplement: pp.109.137745_1.pdf [file pp.109.137745_1.pdf]
